# Supplementary material for: A multi-functional peptide as an HIV-1 entry inhibitor based on self-concentration, recognition, and covalent attachment
Source: Royal Society of Chemistry journal article supplement (doi:10.1039/c2ob25853f), 2012-01-01
Supplement: c2ob25853f.pdf [file c2ob25853f.pdf]

## **Supporting Information**

### **A multi-functional peptide as an HIV-1 entry inhibitor based on self-concentration, recognition, and covalent attachment**

*Lei Zhao, Pei Tong, Yong-Xiang Chen, Zhi-Wen Hu, Kun Wang, Yu-Ning Zhang,  
De-Sheng Zhao, Li-Feng Cai, Ke-Liang Liu, Yu-Fen Zhao, and Yan-Mei Li\**

## Experimental

### Synthesis of Fmoc-Asp(OH)-OChol

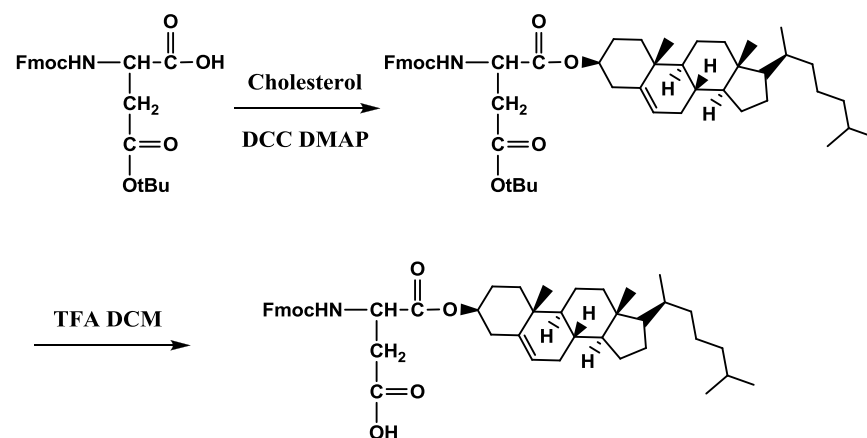

**Fig. S1.** Protocol for Fmoc-Asp(OH)-OChol building block synthesis

$^1\text{H}$  NMR (600MHz,  $\text{CDCl}_3$ ):

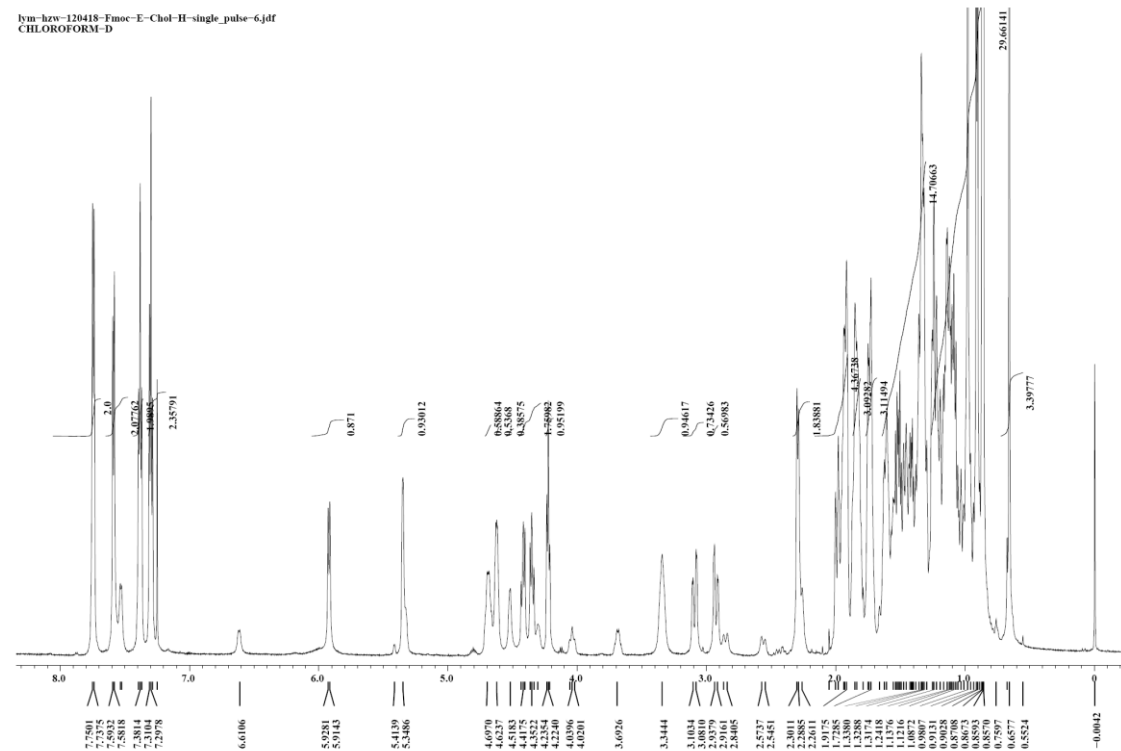

$^{13}\text{C}$  NMR (600MHz,  $\text{CDCl}_3$ ):

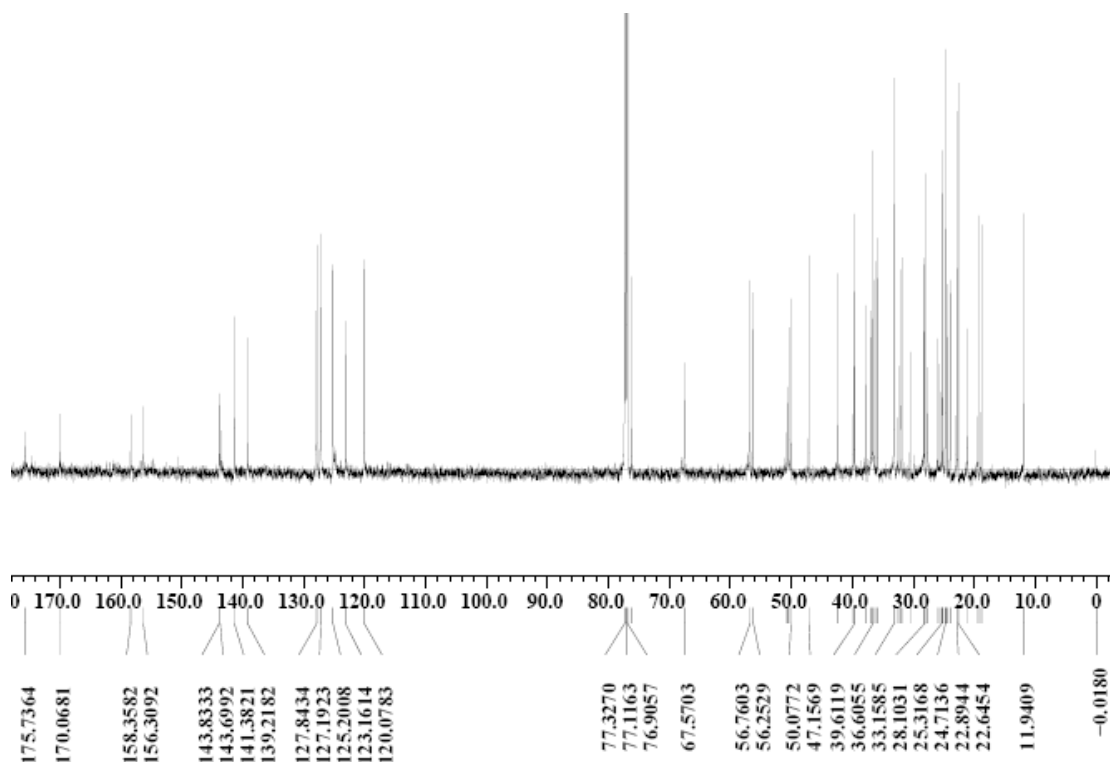

**Fig. S2.**  $^1\text{H}$  and  $^{13}\text{C}$  NMR spectroscopy of Fmoc-Asp(OH)-Chol measured by 600M NMR in the solvent  $\text{CDCl}_3$ .

$^1\text{H}$  NMR (600MHz,  $\text{CDCl}_3$ ):

$\delta$ = 0.66-2.01 (m, H, cholesterol back bone); 2.29 (d, 2H,  $-\text{OCHCH}_2\text{C}=\text{}$ , cholesterol); 2.92-3.10 (q, 2H,  $-\text{CH-CH}_2-\text{C}=\text{O}$ ); 3.34 (m, 1H,  $-\text{COOCH-}$ , cholesterol); 4.22 (t, 1H,  $-\text{CH-CH}_2-$ , Fmoc); 4.35-4.42 (m, 2H,  $-\text{CH-CH}_2-$ , Fmoc); 4.62 (m, 1H,  $-\text{COOH}$ ); 5.35 (m, 1H,  $-\text{C}=\text{CH-}$ , cholesterol); 5.93 (d, 1H,  $-\text{NH-}$ ); 7.30-7.75 (m, 8H, Fmoc, Bzl)

Formula:  $\text{C}_{46}\text{H}_{61}\text{NO}_6$

Mass calculated: 723.45

Mass observed: 746.7 ( $\text{M}+\text{Na}^+$ )

Melting point: 74-76  $^\circ\text{C}$

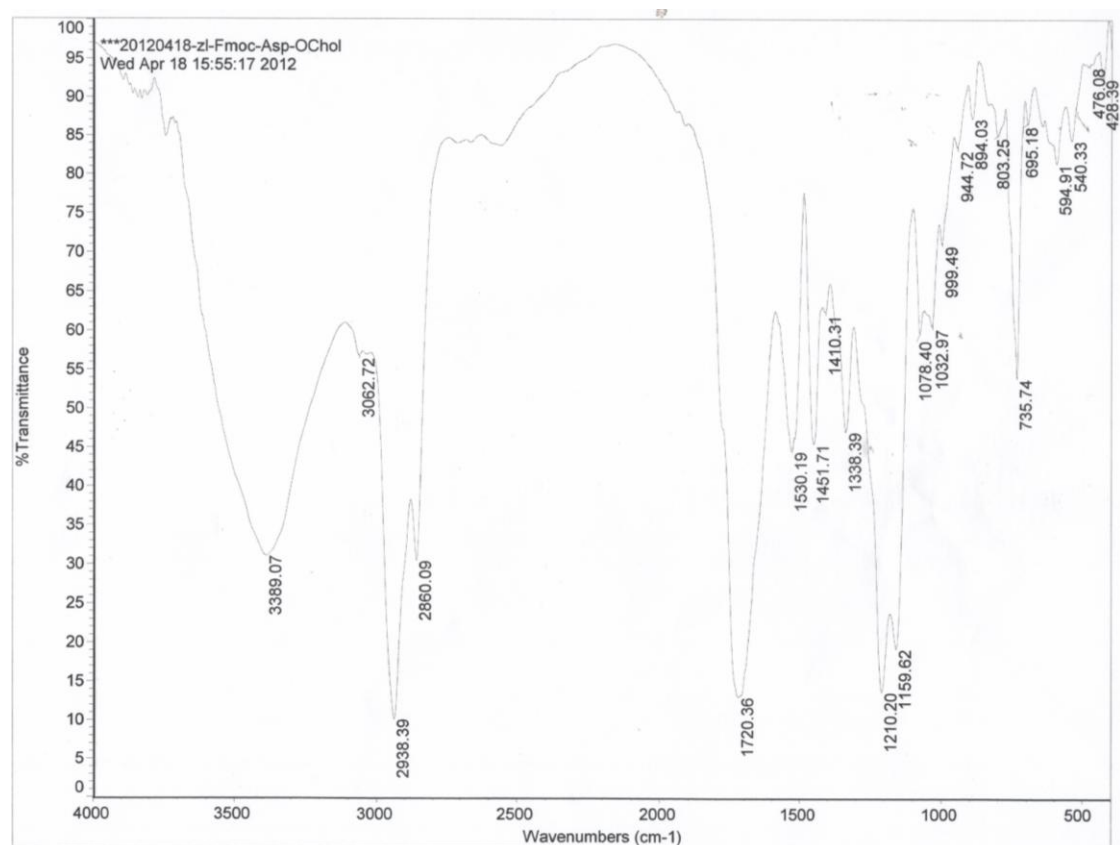

**Fig. S3.** The IR spectra of Fmoc-Asp(OH)-OChol.

**Table S1.** Molecular weight and HPLC purity of synthesized peptides

| Peptides     | Sequence                                                     | Mass<br>calculated | Mass observed                                                   | HPLC purity <sup>c</sup> |
|--------------|--------------------------------------------------------------|--------------------|-----------------------------------------------------------------|--------------------------|
| C34          | Ac-WMEWDREINNYTSLIHSLIEESQNQKEKNEQELL-CONH <sub>2</sub>      | 4287.0125          | 4287.9243 <sup>a</sup>                                          | 95.1%                    |
| NCS-C34      | Ac-WMEWK(NCS)REINNYTSLIHSLIEESQNQKEKNEQELL-CONH <sub>2</sub> | 4342.0423          | 4342.9238 <sup>a</sup>                                          | 93.5%                    |
| C34-Chol     | Ac-WMEWDREINNYTSLIHSLIEESQNQKEKNEQELL-GSGN-Chol              | 4970.4801          | 1244.1011<br>(M+4H <sup>+</sup> ) <sup>b</sup>                  | 97.4%                    |
| NCS-C34-Chol | Ac-WMEWK(NCS)REINNYTSLIHSLIEESQNQKEKNEQELL-GSGN-Chol         | 5026.4885          | 1258.3667<br>(M+4H <sup>+</sup> ) <sup>b</sup>                  | 93.1%                    |
| NCS-C34-Chol | Ac-WMEWK(NCS)REINNYTSLIHSLIEESQNQKERNEQELL-GSGN-Chol         | 5054.4947          | 1034.4884<br>(M+4H <sup>+</sup> +Na <sup>+</sup> ) <sup>b</sup> | 95.0%                    |
| K655R        |                                                              |                    |                                                                 |                          |
| N36          | Ac-SGIVQQNNLLRAIEAQHLLQLTVWGIRQLQARIL-CONH <sub>2</sub>      | 4161.3612          | 4163.3443 <sup>a</sup>                                          | 97.7%                    |

[a], mass observed from MALDI-TOF. [b], mass observed from ESI-QTOF. [c], HPLC purities were recorded by C-8 or polar CN column with a flow rate of 0.8 mL·min<sup>-1</sup>.

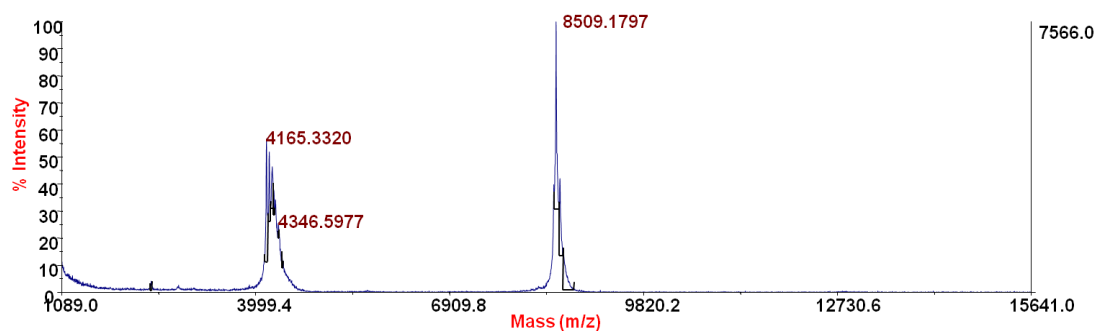

**Fig. S4.** MALDI-TOF result of N36/NCS-C34 covalent dimer. The sample was prepared by co-incubation of N36 and NCS-C34 in PBS buffer at 37 °C for 12 h. After incubation, N36 and NCS-C34 formed a dimer covalently and completely in HPLC. The peak which has retention time 19 min show the covalent dimer of N36 and NCS-C34.

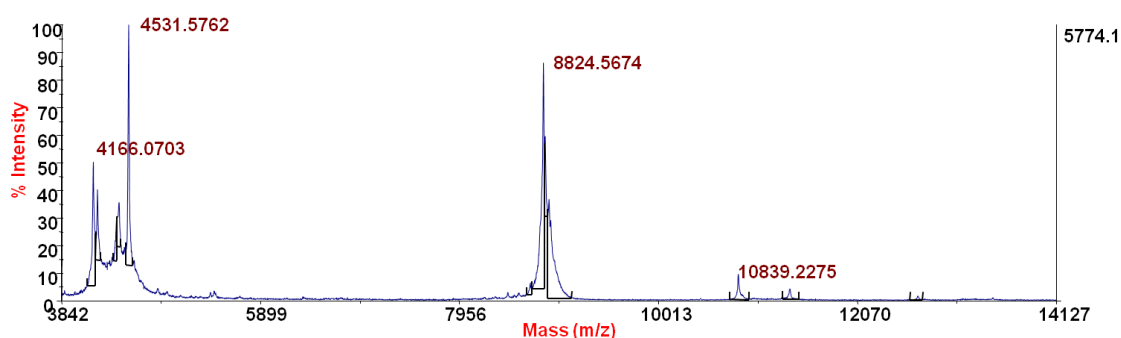

**Fig. S5.** MALDI-TOF result of N36/NCS-C34-Chol covalent dimer with cholesterol degradation. The sample was prepared by co-incubation of N36 and NCS-C34-Chol in PBS buffer at 37 °C for 48 h. After incubation, N36 and NCS-C34-Chol formed a dimer covalently and completely in HPLC. However, the MALDI-TOF data indicated that cholesterol group has been degraded. The truncated peptide without cholesterol was represented in retention time 23 min in analytical HPLC.

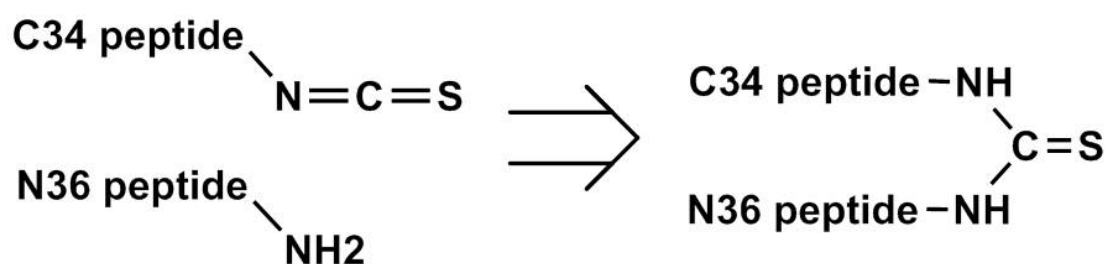

**Fig. S6.** The chemical process of the covalent reaction.
